# Supplementary material for: Elderly with Varying Extents of Cardiac Disease Show Interindividual Fluctuating Myocardial TRPC6-Immunoreactivity
Source: MDPI journal article supplement (doi:10.3390/jcdd10010026), 2023-01-09
Supplement: s1 [file s1]

## **- Appendix -**

**“In elderly severe cardiac disease is associated with less  
TRPC6-immunoreactivity in clinically relevant anatomic localizations”**

### **Table of content – Appendix**

|                                                              |      |
|--------------------------------------------------------------|------|
| Supplement A – Fixation of the body donors                   | ii   |
| Supplement B – Cause of death according to death certificate | iv   |
| Supplement C – Orientation of the specimens                  | v    |
| Supplement D – Protocol hematoxylin-eosin-stain              | vii  |
| Supplement E – Protocol alcian-blue-hematoxylin-eosin-stain  | viii |
| Supplement F – Protocol Masson-Goldner-trichrome-stain       | x    |
| Supplement G – TRPC6 immunohistochemistry                    | xii  |
| Supplement H – Material, chemicals, software                 | xiv  |

## Supplement A – Fixation of the body donors

Each body donor was perfused with 10 to 15 liter of fixation solution via the right femoral artery with a pressure of 1.5 to 2 bar. Table A.1 depicts the solution used for the nitrite pickling salt-ethanol-polyethylene glycol (NEP) fixation according to Weigner while table A.2 shows the solution used for formalin fixation according to Basler. The NEP-fixation solution was bought as a ready to use solution (for more details please see supplement H).

**Table A.1 – NEP fixation according to Weigner**

| Substance        | Quantity |
|------------------|----------|
| Water            | 39 liter |
| Carion           | 12 l     |
| Formaldehyde     | 6 l      |
| Lysoformin       | 2.7 l    |
| Sodium chloride  | 2400 g   |
| Calcium chloride | 600 g    |
| Thymol           | 12 g     |

**Table A.2 – Formalin fixation according to Basler**

| Substance           | Percent by weight |
|---------------------|-------------------|
| Ethanol             | 25 - <35          |
| polyethylene glycol | 10 - <25          |
| Formaldehyde        | 0,1 - <1          |
| Methanol            | 0,1 - <1          |

---

*table A.2 continued*

---

|                       |                                       |
|-----------------------|---------------------------------------|
| demineralized water   | Not further specified by manufacturer |
| nitrite pickling salt | Not further specified by manufacturer |

---

In the upper and lower limbs as well as the gluteal and nuchal region the respective fixation solution was additionally directly injected using 14G cannulas.

Following perfusion and direct injection the corpses were placed in 3 to 5 % formalin solution for 4 months. Afterwards the body were stored in air- and watertight pharopack caskets by a temperature of 14 degrees Celsius.

## Supplement B – Cause of death according to death certificates

**Table B.1 – Summary causes of death for each body donor**

| Donor number | Information death certificate                                                                                                                                                                                                       |
|--------------|-------------------------------------------------------------------------------------------------------------------------------------------------------------------------------------------------------------------------------------|
| 1            | <ul style="list-style-type: none"><li>• Embolism</li><li>• Coxarthrosis</li></ul>                                                                                                                                                   |
| 2            | <ul style="list-style-type: none"><li>• Septic shock</li><li>• Pneumonia</li><li>• Urinary tract infection</li></ul>                                                                                                                |
| 3            | <ul style="list-style-type: none"><li>• Omission of dialysis in end-stage chronic kidney disease</li><li>• Progression metastasized prostate cancer</li><li>• cerebral ischemia</li><li>• diabetes mellitus</li></ul>               |
| 4            | <ul style="list-style-type: none"><li>• cardiogenic shock</li><li>• tachyarrhythmia</li><li>• coronary heart disease</li></ul>                                                                                                      |
| 5            | <ul style="list-style-type: none"><li>• Prostate carcinoma</li><li>• Liver metastasis</li><li>• Chronic obstructive pulmonary disease</li><li>• Occlusive peripheral arterial disease</li><li>• Cachexia</li><li>• Anemia</li></ul> |

## Supplement C – Orientation of the specimens

**Table C.1 – Summary of the orientation of the tissue slices**

| <b>Specimen</b>                                                | <b>Description orientation</b>                                                                                                                                                                                                                                                                                                                                                             |
|----------------------------------------------------------------|--------------------------------------------------------------------------------------------------------------------------------------------------------------------------------------------------------------------------------------------------------------------------------------------------------------------------------------------------------------------------------------------|
| Right atrial appendage                                         | The specimen was embedded so that cross sections through the structure were obtained.                                                                                                                                                                                                                                                                                                      |
| Junction of the left lower pulmonary vein with the left atrium | The samples were obtained so that the specimen was a rectangular strip with its long side comprising the end section of the left lower pulmonary vein, its junction with the left atrium, and the adjacent atrial myocardium. The specimen was embedded following the longitudinal axis of the vessel. So, the slides showed a longitudinal section through the aforementioned structures. |
| Left anterior papillary muscle                                 | In four randomly chosen samples the head of the papillary muscle was cut in half by a longitudinal section. Both pieces were embedded so that the sections showed a longitudinal plane of the structure. The one remaining sample was cut in half by a cross section. The specimen was embedded resulting in cross sections obtained by microtomy.                                         |

*Table C.1 continued*

|                                  |                                                                                                                                                                                                                                               |
|----------------------------------|-----------------------------------------------------------------------------------------------------------------------------------------------------------------------------------------------------------------------------------------------|
| Proximal interventricular septum | The specimen was obtained as rectangular piece with its long side comprising both – the membranous and the muscular interventricular septum. The tissue was embedded so that longitudinal sections could have been obtained during microtomy. |
| Septomarginal trabeculation      | The specimen was embedded so that microtomy provided cross sections through the structure.                                                                                                                                                    |

## **Supplement D – Protocol hematoxylin-eosin-stain**

|                                            |                |
|--------------------------------------------|----------------|
| Xylene                                     | 5 min          |
| Xylene                                     | 5 min          |
| Xylene                                     | 5 min          |
| 100% 2-Propanol                            | 5 min          |
| 100% 2-Propanol                            | 5 min          |
| 90% 2-Propanol                             | 5 min          |
| 80% 2-Propanol                             | 5 min          |
| Filtered hematoxylin according to Ehrlich  | 8 min          |
| Distilled water                            | rinsing        |
| Fluent water                               | blueing        |
| Distilled water                            | rinsing        |
| Eosin (0.1% + 2 drops glacial acetic acid) | 2.5 min        |
| 90% 2-Propanol                             | 2 – 3x dipping |
| 100% 2-Propanol                            | 5 min          |
| 100% 2-Propanol                            | 5 min          |
| Xylene                                     | 5 min          |
| Xylene                                     | 5 min          |
| Xylene                                     | 5 min          |

## **Supplement E – Protocol alcian-blue-hematoxylin-eosin-stain**

|                                |                 |
|--------------------------------|-----------------|
| Xylene                         | 10 min          |
| Xylene                         | 10 min          |
| Xylene                         | 10 min          |
| 100% Ethanol                   | 5 min           |
| 100% Ethanol                   | 5 min           |
| 90% Ethanol                    | 5 min           |
| 80% Ethanol                    | 5 min           |
| 70% Ethanol                    | 5 min           |
| Distilled water                | 5 min           |
| Distilled water                | 5 min           |
| 3% Acetic acid                 | 5 min           |
| Alcian-blue-solution           | 45 min          |
| Distilled water                | 1 min           |
| Hematoxylin according to Mayer | 10 min          |
| Distilled water                | rinsing         |
| Hydrochloric acid-alcohol      | differentiation |
| Water                          | 10 min          |
| Eosin                          | 3 min           |



|                 |                |
|-----------------|----------------|
| Distilled water | rinsing        |
| 70% Ethanol     | 2 – 3x dipping |
| 80% Ethanol     | 2 – 3x dipping |
| 90% Ethanol     | 2 – 3x dipping |
| 100% Ethanol    | 3 min          |
| 100% Ethanol    | 3 min          |
| Xylene          | 3 min          |
| Xylene          | 3 min          |
| Xylene          | 3 min          |

## **Supplement F – Protocol Masson-Goldner-trichrome-stain**

|                                    |           |
|------------------------------------|-----------|
| Xylene                             | 10 min    |
| Xylene                             | 10 min    |
| Xylene                             | 10 min    |
| 100% Ethanol                       | 5 min     |
| 100% Ethanol                       | 5 min     |
| 90% Ethanol                        | 5 min     |
| 80% Ethanol                        | 5 min     |
| 70% Ethanol                        | 5 min     |
| Distilled water                    | 5 min     |
| Distilled water                    | 5 min     |
| Weigert's Iron-hematoxylin         | 1 - 2 min |
| Water                              | 10 min    |
| Ponceau-acidic fuchsin -azophloxin | 5 min     |
| 1% Acetic acid                     | rinsing   |
| Wolfram phosphoric acid orange     | 5 min     |
| 1% Acetic acid                     | rinsing   |
| light green                        | 5 min     |
| 1% Acetic acid                     | 5 min     |

|              |         |
|--------------|---------|
| 100% Ethanol | dipping |
| 100% Ethanol | dipping |
| Xylene       | 5 min   |
| Xylene       | 5 min   |
| Xylene       | 5 min   |

## **Supplement G – TRPC6 immunohistochemistry**

### **E.1 – Peptide control**

The peptide control was used to demonstrate specificity of the primary antibody. Therefore, the primary i.e. anti-TRPC6 antibody was pre-incubated with the TRPC6 blocking peptide provided by the manufacturer of the primary antibody, also. The resulting solution was utilized once instead of the pure primary antibody for establishment of the TRPC6-immunohistochemistry. The peptide control was rated as *successful* in case the slide was significantly less stained or even not stained.

### **E.2 – Negative control per staining run**

A negative control was included in each staining run to allow for verification of the the response produced by the secondary antibody coupled with a horseradish peroxidase-coupled secondary antibody. Therefore, a diluted rabbit serum (Thermo Fisher Scientific, Carlsbad, United States of America) with a similar protein concentration as that of the primary antibody was applied instead of the antibody.

### **E.3 – TRPC6 immunohistochemistry**

An indirect immunohistochemistry method was selected.

First the slides underwent kerosene detachment. Subsequently, for antigen recovery the sections were placed in citrate buffer at 95 degrees celsius (one hour). A normal goat serum (Ref.: G6767; Sigma Aldrich, St. Louis, Missouri, United States of America) was applied for blocking (room temperature). The primary antibodies incubated overnight. Afterwards, the secondary antibody was applied, then the chromogen diaminobenzidine. Hematoxylin according to Ehrlich (Carl Roth, Karlsruhe, Germany) was subsequently used for counterstaining.

#### **E.4 – Selection of primary antibody concentration prior to study**

Before all tissue slices were undertaken TRPC6-immunohistochemistry a serial staining with a dilution series of the primary antibody concentration was performed. Therefore, the tissue of the right atrial appendage of donor 4 was chosen as this was one of the largest samples obtained. The primary antibody was applied in the following concentrations: (1) 1:100, (2) 1:250, (3) 1:500, and (4) 1:1000. The rest of the protocol remained unchanged. The overall best result was achieved with the 1:250 dilution. So, this was applied to stain the rest of the tissue slices and was used to conduct the presented study.

## Supplement H – Material, chemicals, software

**Table H.1 – Summary of material, chemicals / reagents, and software used**

| Resource (i. e. material, chemical, etc.)                            | Details                                                                                                                               |
|----------------------------------------------------------------------|---------------------------------------------------------------------------------------------------------------------------------------|
| Primary antibody (Anti-TRPC6 Antibody)                               | Ref.: ACC017; Alomone Labs, Jerusalem, Israel                                                                                         |
| Secondary antibody (Anti-rabbit coupled with horseradish peroxidase) | Ref.: A10547; Invitrogen, Carlsbad, California, United States of America.                                                             |
| Normal rabbit serum                                                  | Ref.: PLN5001; Life Technologies, Carlsbad, California, United States of America.                                                     |
| TRPC6 Blocking Peptide                                               | Ref.: BLP-CC017; Alomone Labs, Jerusalem, Israel                                                                                      |
| Normal goat serum                                                    | Ref.: G6767; Sigma Aldrich, St. Louis, Missouri, United States of America                                                             |
| alcian blue solution                                                 | Ref.: 3082; Carl Roth, Karlsruhe, Germany                                                                                             |
| citrate buffer                                                       | Ref.: ab93678; abcam, Cambridge, United Kingdom                                                                                       |
| 3,3'-diaminobenzidine                                                | Ref.: SK-4103; Vector Laboratories, Burlingame, California, United States of America                                                  |
| Eosin                                                                | Obtained as ready to use solution from the central chemical stock of the Saarland University, Campus Homburg, Homburg (Saar), Germany |

*Table H.1 continued*

|                                                                                 |                                                                                                                |
|---------------------------------------------------------------------------------|----------------------------------------------------------------------------------------------------------------|
| Acetic acid                                                                     | VWR International GmbH, Darmstadt,<br>Germany                                                                  |
| Ethanol                                                                         | Carl Roth, Karlsruhe, Germany                                                                                  |
| Masson Goldner Trichrom                                                         | Ref.: 12043; Süsse Labortechnik, Gudensberg,<br>Germany                                                        |
| Ready to use fixation solution according<br>to Weigner (applied for body donor) | Ref.: 27796; Otto Fischar GmbH & Co. KG,<br>Saarbrücken, Germany                                               |
| Ready to use formaldehyde fixation<br>solution (applied for body donors)        | Ref.: 27244; Otto Fischar GmbH & Co. KG,<br>Saarbrücken, Germany                                               |
| Ready to use 4% phosphate buffered<br>formalin solution                         | Roti-Histofix, Carl Roth, Karlsruhe, Germany                                                                   |
| Hematoxylin according to Ehrlich                                                | Carl Roth, Karlsruhe, Germany                                                                                  |
| Paraffin                                                                        | Carl Roth, Karlsruhe, Germany                                                                                  |
| Phosphate buffered saline                                                       | Ref.: 1105.1, Carl Roth, Karlsruhe, Germany                                                                    |
| Hydrogen peroxide                                                               | Ref.: 8683.4; central chemical stock of the<br>Saarland University, Campus Homburg,<br>Homburg (Saar), Germany |
| Pouring station (MPS/P2)                                                        | SLEE medical, Mainz, Germany                                                                                   |
| Embedding machine (Automatic Tissue<br>Processor MTP)                           | SLEE medical, Mainz, Germany                                                                                   |
| Humidity chamber                                                                | Panalo-em, central chemical stock of the<br>Saarland University, Campus Homburg,<br>Homburg (Saar), Germany    |
| Olympus BX60 microscope                                                         | Olympus, Shinjuku, prefecture Tokyo, Japan                                                                     |

---

*Table H.1 continued*

|                                                      |                                                                                                                                                                           |
|------------------------------------------------------|---------------------------------------------------------------------------------------------------------------------------------------------------------------------------|
| Olympus D37 camera                                   | Olympus, Shinjuku, prefecture Tokyo, Japan                                                                                                                                |
| Olympus cellSens Dimensions Version 1.15 Build 14760 | Olympus, Shinjuku, prefecture Tokyo, Japan                                                                                                                                |
| Cooling plate                                        | SLEE medical, Mainz, Germany                                                                                                                                              |
| Microtome Microm RM 2025                             | Heidelberg Instruments, Heidelberg, Germany                                                                                                                               |
| Heating plate                                        | VWR International GmbH, Darmstadt, Germany                                                                                                                                |
| Warming oven                                         | VWR International GmbH, Darmstadt, Germany                                                                                                                                |
| water bath                                           | GFL („Gesellschaft für Labortechnik“ [society for laboratory technique] mbH), Burgwedel, Germany                                                                          |
| Dako Pen                                             | Ref.: S200230-2; Agilent, Glostrup, Denmark                                                                                                                               |
| Cover slips                                          | Central stock, Saarland University Hospital, Homburg (Saar), Germany (i. e. manufacturer / product can vary dependent on what was bought by the central stock department) |
| Mounting medium RotiHistoKitII                       | Carl Roth, Karlsruhe, Germany                                                                                                                                             |
| Microtome blades                                     | Leica-Microsystem, Wetzlar, Germany                                                                                                                                       |
| Microscope slides „Superfrost Plus“                  | R. Langenbrinck, Emmendingen, Germany                                                                                                                                     |
| R Version 4.1.3                                      | R Core Team (2022). R: A Language and environment for statistical computing. R Foundation for Statistical Computing, Vienna, Austria.                                     |

---



---

*Table H.1 continued*

---

|                       |                                                                                                                                                                                                                                                                             |
|-----------------------|-----------------------------------------------------------------------------------------------------------------------------------------------------------------------------------------------------------------------------------------------------------------------------|
| RStudio 2022.07.1+554 | "Spotted Wakerobin" Release<br><br>(7872775ebddc40635780ca1ed238934c3345c5de,<br>2022-07-22) for Windows<br><br>Mozilla/5.0 (Windows NT 10.0; Win64; x64)<br><br>AppleWebKit/537.36 (KHTML, like Gecko)<br><br>QtWebEngine/5.12.8 Chrome/69.0.3497.128<br><br>Safari/537.36 |
|-----------------------|-----------------------------------------------------------------------------------------------------------------------------------------------------------------------------------------------------------------------------------------------------------------------------|

---
